# Supplementary material for: Tumor suppressor RARRES1- A novel regulator of fatty acid metabolism in epithelial cells
Source: PubMed Central journal article supplement (PMC6296515; doi:10.1371/journal.pone.0208756), 2018-12-17

# S8 Figure

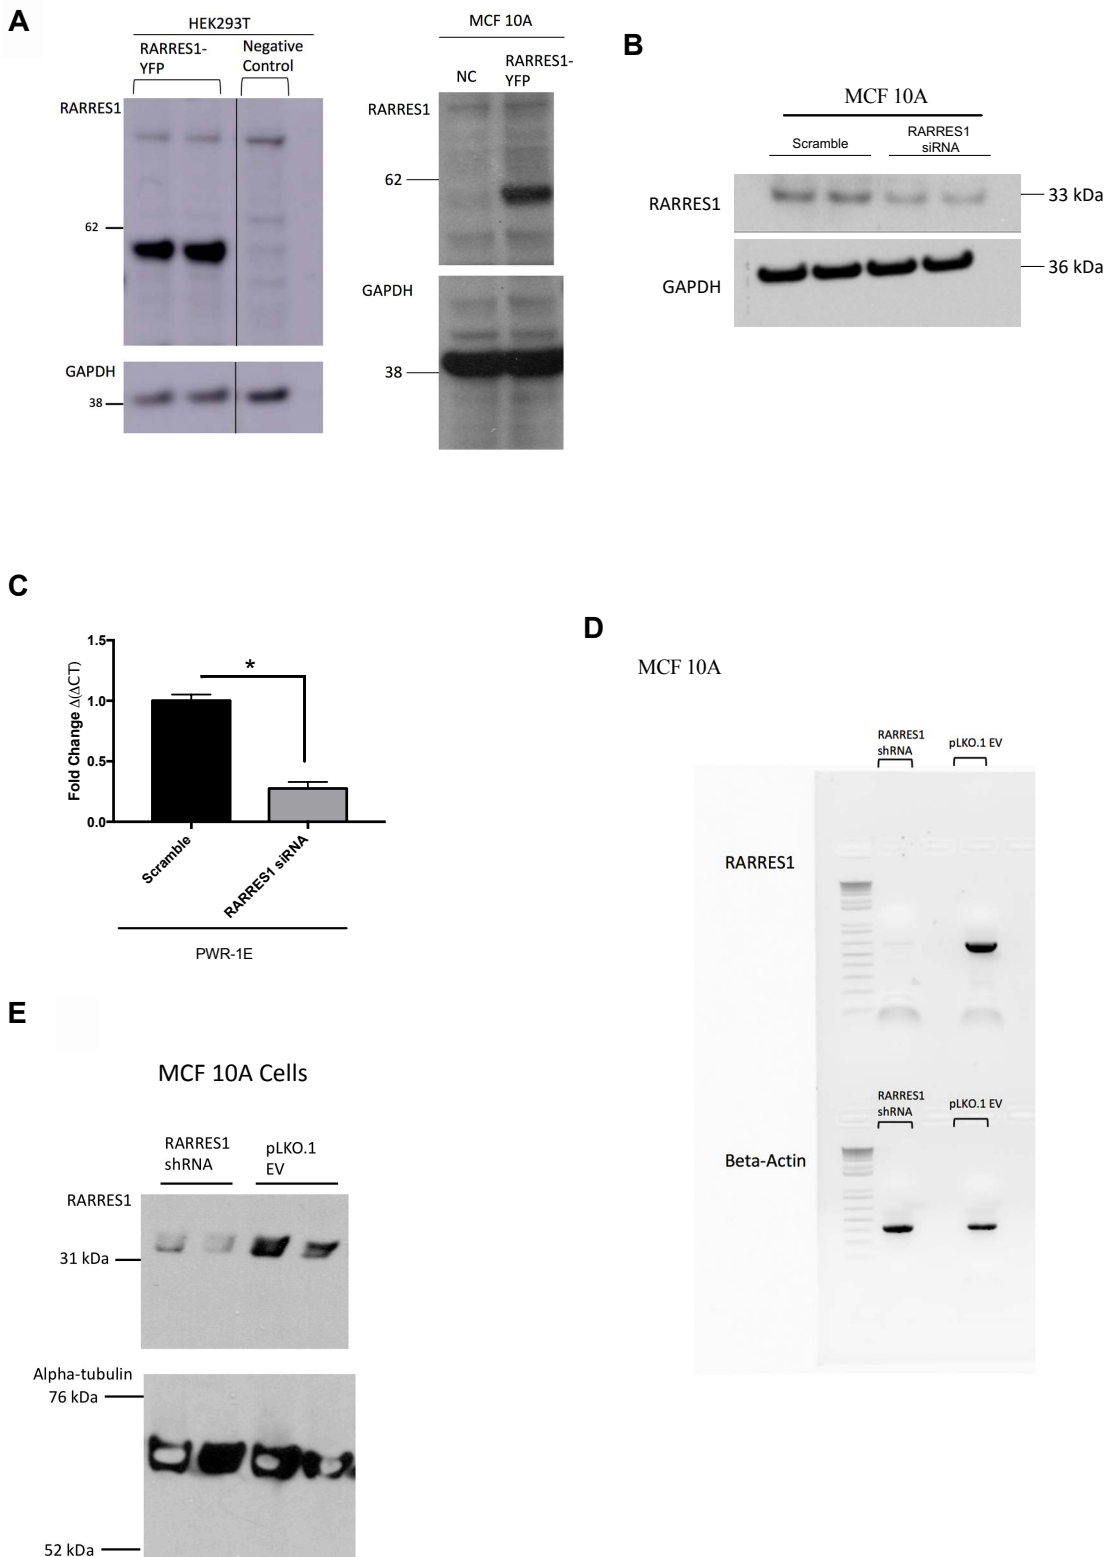

Supplement: pone.0208756.s008.pdf [file pone.0208756.s008.pdf]
