# Supplementary material for: Tumor suppressor RARRES1- A novel regulator of fatty acid metabolism in epithelial cells
Source: PubMed Central journal article supplement (PMC6296515; doi:10.1371/journal.pone.0208756), 2018-12-17

# S9 Figure

**A**

HEK 293 T Cells

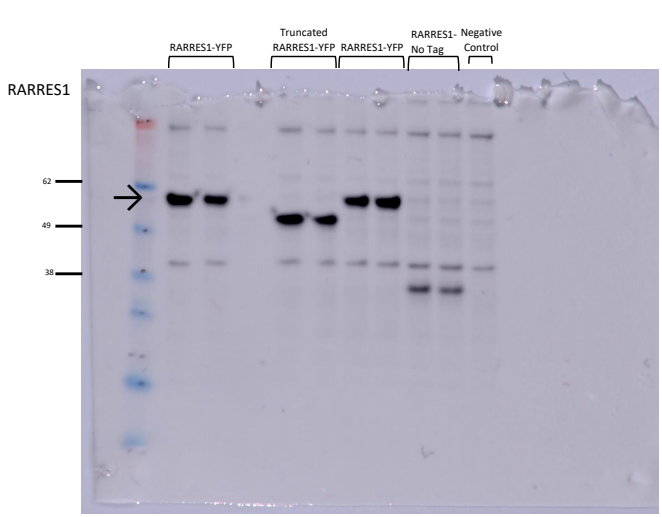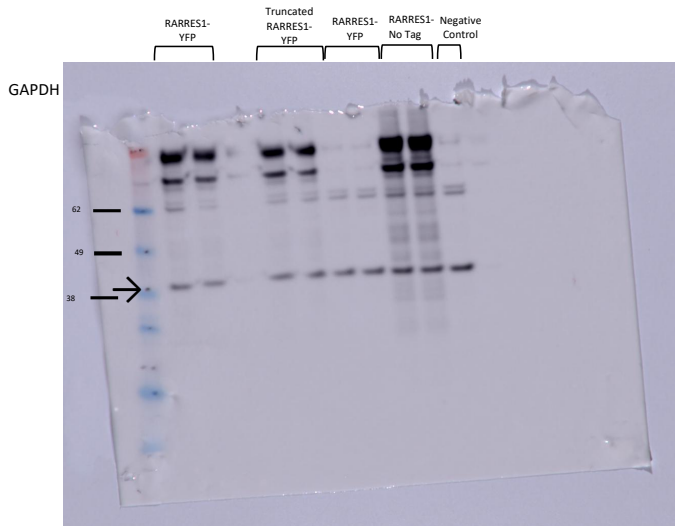

**B**

MCF 10A Cells

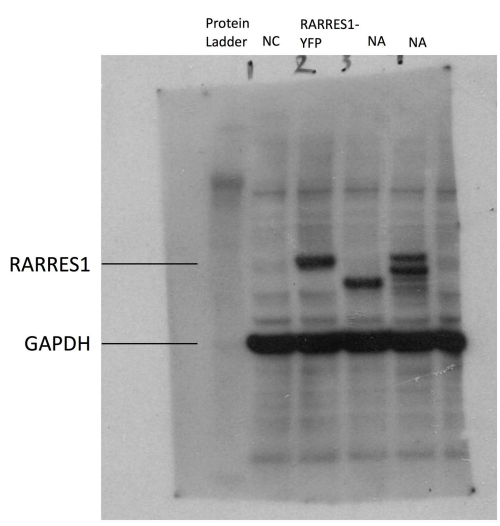

**C**

MCF 10A Cells

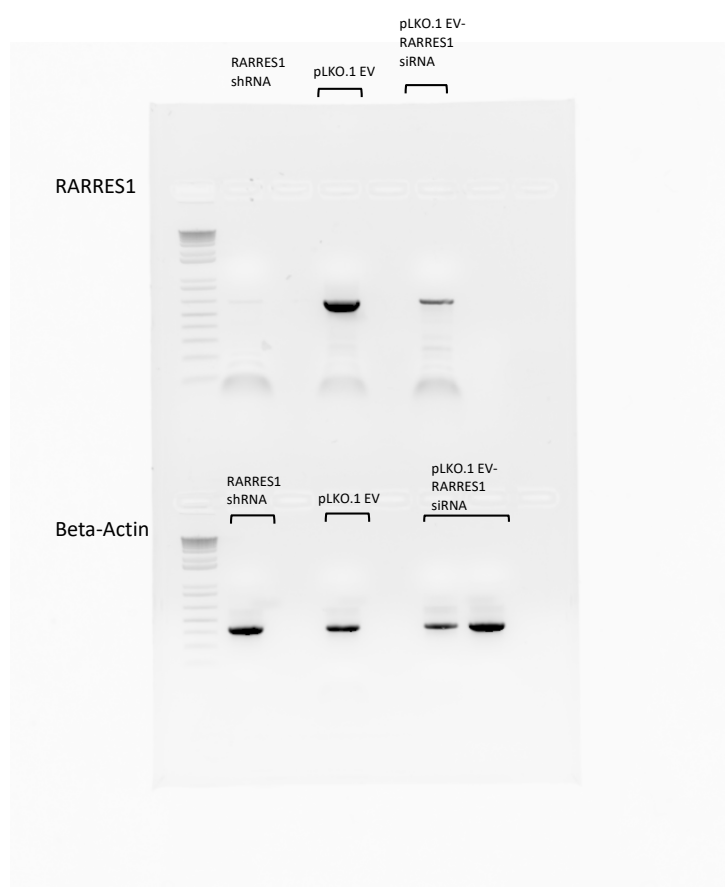

**D** MCF 10A

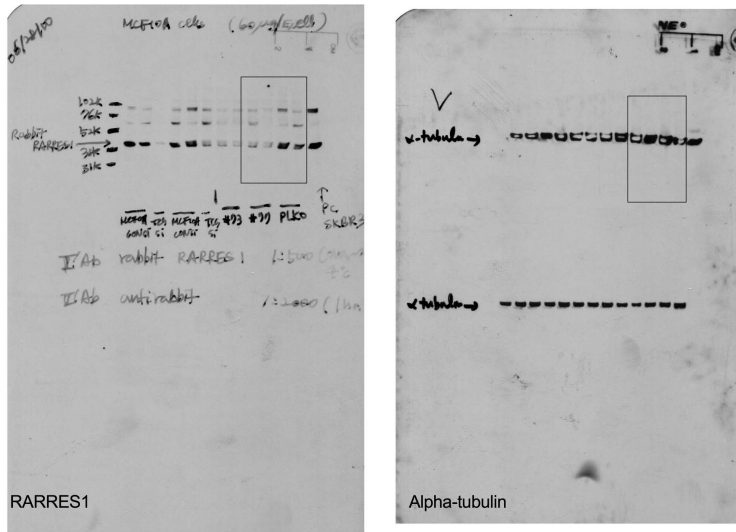

**E** MCF 10A

RARRES1

GAPDH

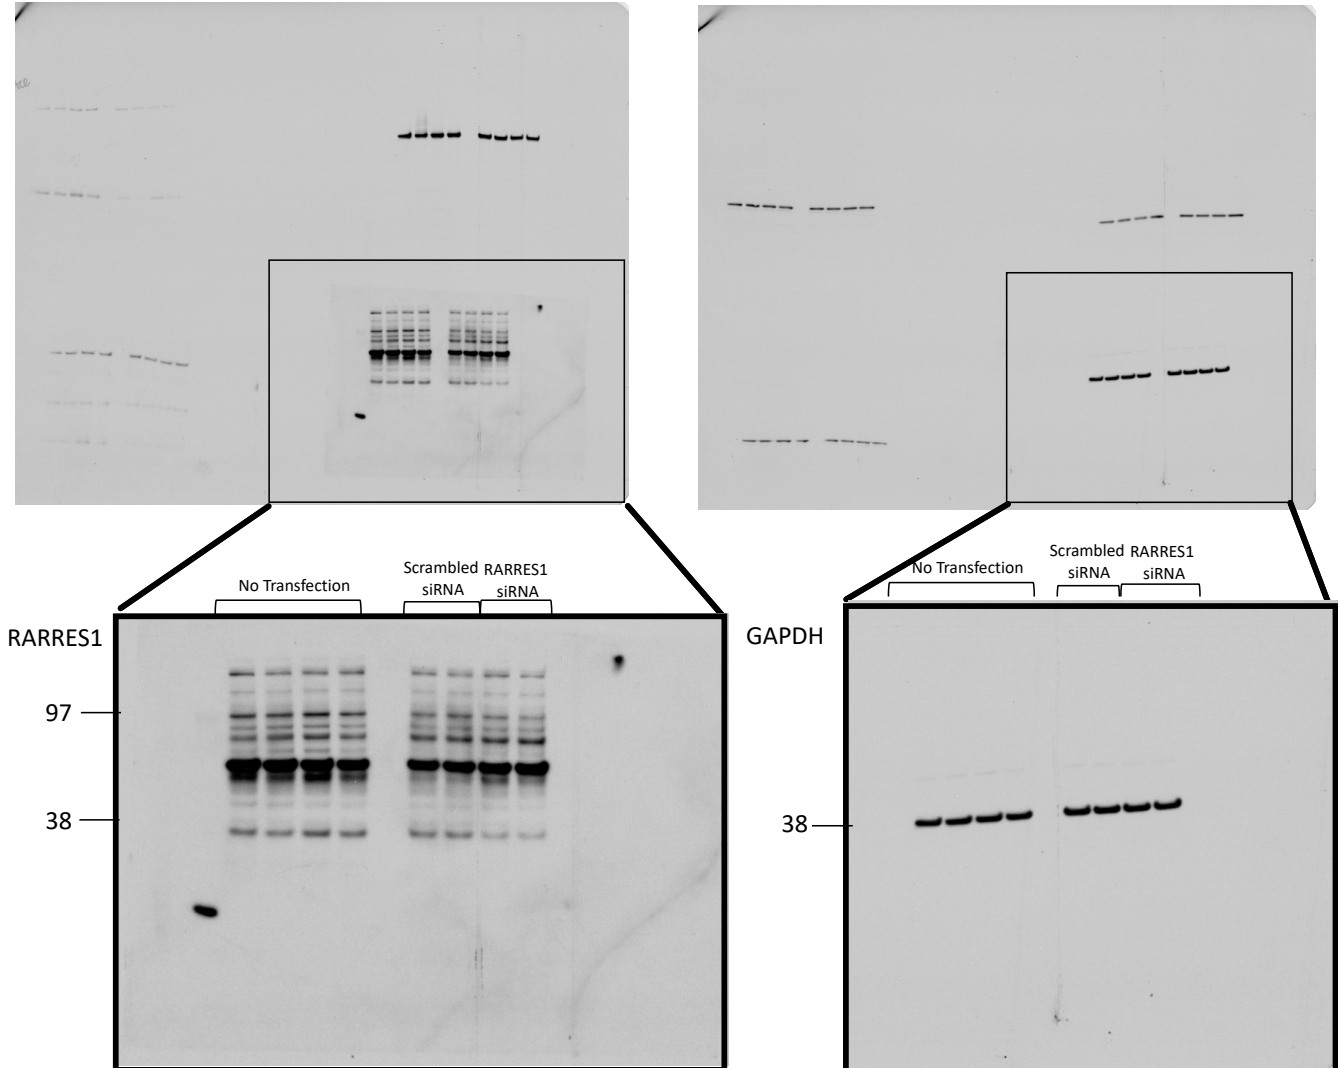

**F**

**RARRES1**

24 Hour Starvation  
Control Scrambled RARRES1  
siRNA siRNA

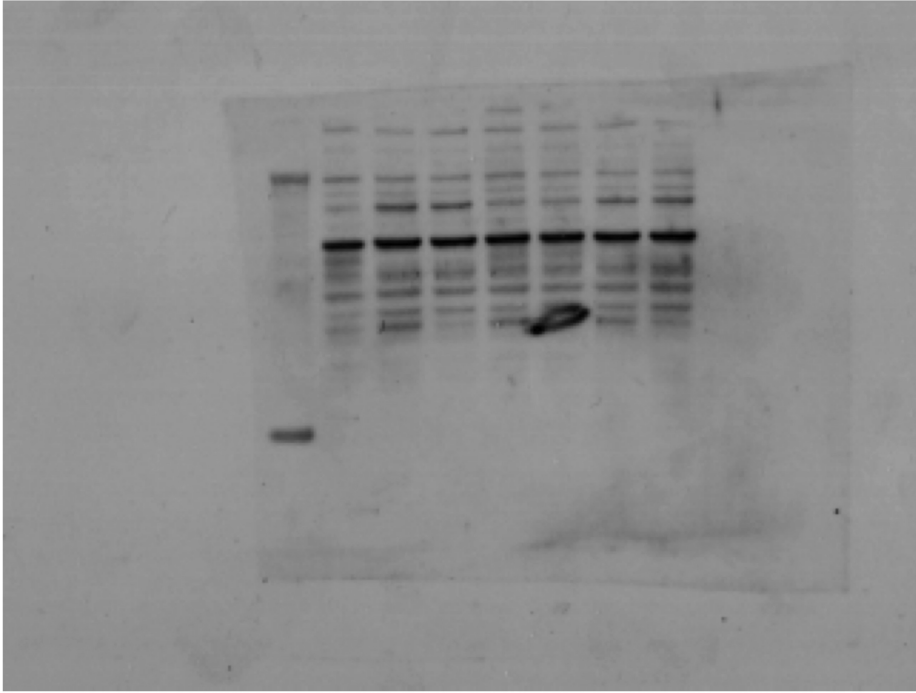

**Alpha-Tubulin**

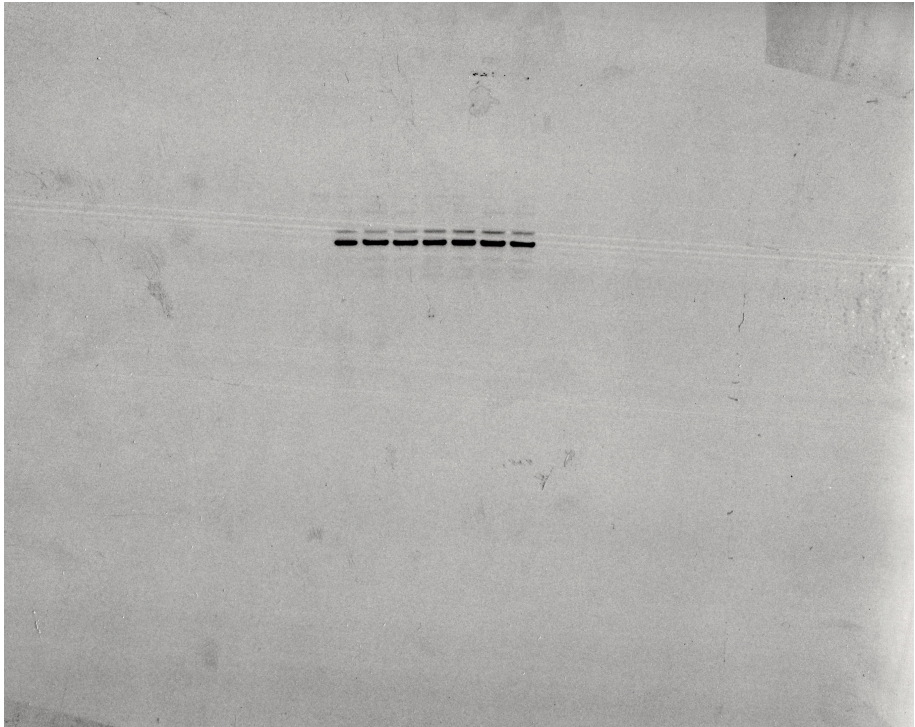

Supplement: pone.0208756.s009.pdf [file pone.0208756.s009.pdf]
